# Supplementary material for: Comparison of Pattern Detection Methods in Microarray Time Series of the Segmentation Clock
Source: PLoS One. 2008 Aug 6;3(8):e2856. doi: 10.1371/journal.pone.0002856 (PMC2481401; doi:10.1371/journal.pone.0002856)
Supplement: Table S9 — (0.13 MB XLS) [file pone.0002856.s010.xls]

## Sheet: Sheet1
Table S9. Composition of the clusters identified among the Top 300 Probe sets of the P analysis. The 17 columns correspond to the 17 time points (values in Log2 ratios, see Methods).
Cluster 1
ProbeSet ID	Gene Symbol	1	2	3	4	5	6	7	8	9	10	11	12	13	14	15	16	17
1436717_x_at	Hbb-y	1.40734	1.82411	1.03558	-1.71206	-4.68018	-10.4439	-5.32155	-5.01768	0.308292	-2.46001	-2.49169	-0.547112	-0.23125	-3.22801	0.609411	1.84275	-8.63659
1449643_s_at	Btf3	0.241673	0.554383	-0.0276116	-0.152491	-0.192132	-0.307207	-0.376761	-0.315939	0.221538	0.0753434	-0.0784119	0.0750763	-0.00173934	-0.105104	-0.00371312	0.0385504	0.0540854
1422789_at	Aldh1a2	-1.60996	-0.79367	0.916329	-2.67409	-0.775968	-2.48966	-0.724129	0.334086	2.06124	-2.00424	1.63797	0.587579	-0.885593	-0.829739	-1.20278	-1.15624	-1.32617
1428301_at	LOC544988 /// B930046C15Rik /// LOC545007 /// 2610042L04Rik /// LOC622931 /// LOC638853 /// LOC664825 /// LOC666193 /// LOC666329 /// LOC666442 /// LOC666684 /// LOC666740 /// LOC666772 /// LOC666890 /// LOC671957	0.405079	0.0167855	0.470682	0.120405	-0.83473	-0.15458	-0.19938	-0.551995	-0.030645	0.420837	0.19612	0.732103	-0.876382	-0.173188	-0.44896	-0.0342212	-0.129501
1437990_x_at	Hbb-bh1	1.4486	2.01858	0.580333	-2.12276	-3.55596	-8.14759	-7.61707	-7.85808	0.12024	-2.47831	-2.27039	-0.598124	-0.420423	-3.04605	0.244253	2.07064	-6.92519
1436823_x_at	Hbb-y	1.39952	1.83382	0.907742	-1.71898	-4.54228	-10.7122	-8.27924	-4.96804	0.30084	-2.55233	-2.49303	-0.575212	-0.156656	-3.14996	0.467084	1.96141	-10.2268
1437810_a_at	Hbb-bh1	1.52348	1.77698	0.484193	-2.37897	-3.94365	-4.25429	-5.2173	-3.95122	-0.167934	-2.47123	-2.84866	0.0195316	-0.887177	-2.93612	0.305865	2.24566	-5.31163
1416224_at	Zbtb17	0.100888	0.575165	0.351995	-0.844024	-0.208674	-0.346178	-0.406299	-0.238422	0.188859	0.132926	0.215036	0.275605	-0.156111	-0.274387	0.275605	0.06148	-0.387998
1415792_at	AL033326	0.313697	0.285654	0.310771	-0.103778	-0.435992	-0.516865	-1.7084	-0.117509	0.0445107	0.366791	-0.277858	0.294569	-0.198581	-0.329428	0.257055	0.407081	0.190158
1433961_at	BC023814	0.264221	0.228707	0.309545	0.0532942	-0.028944	-0.405979	-0.321289	-0.258519	-0.416484	0.0796972	-0.073968	0.0558297	0.22195	-0.260094	0.120235	0.270784	-0.169944
1452151_at	BC021523	0.374646	0.157887	0.338393	-0.201634	-0.177314	-0.419225	-0.177314	0.545109	-0.178733	-0.0826098	0.0285692	0.00500936	-0.194438	-0.0986399	-0.108074	0.0493277	-0.223438
1427914_a_at	Tceb1	0.303321	0.382952	-0.0574387	-0.238173	-0.350711	-0.303724	-0.30982	-0.0730355	-0.241811	0.358752	0.517618	0.261281	-0.10607	-0.0757597	-0.207406	-0.153517	-0.1516
1417573_at	2010311D03Rik	0.0772926	0.254223	0.142418	-0.0471517	-0.103929	-0.49839	-0.226347	0.159945	0.115056	-0.0290183	0.198304	0.161234	-0.0937004	-0.0679696	-0.0434324	-0.0260792	-0.155185
1451162_at	Hsbp1	0.0532294	0.257092	-0.0455394	-0.0995695	-0.238002	-0.240194	0.0727856	-0.480737	0.0949813	0.325877	0.0692496	0.181592	-0.072627	-0.0590196	0.0821728	-0.00521692	-0.102225
1450447_at	Hnf4a	0.185899	-0.0202735	0.761162	0.0961684	0.0168795	-0.411807	-0.484942	0.0451289	-0.300979	-0.198061	-0.251054	-0.246155	0.130474	0.0767509	0.141731	0.378997	-0.549859
1417713_at	Eif2s2	0.119268	0.505883	0.310039	-0.580532	-0.299307	-0.354074	-0.18748	-0.395775	0.157502	0.917982	-0.21948	0.160347	-0.304691	-0.365793	0.100505	-0.135093	-0.317498
1449083_at	Ccdc91	0.137182	0.111342	0.187514	-0.0857795	-0.228073	-0.261445	-0.0542439	0.0938548	0.256725	0.0885669	-0.103826	0.5893	-0.0157697	-0.619841	-0.702982	0.236149	-0.159361
1448571_a_at	Gmfb	-0.0403409	0.0730649	-0.00154001	-0.195337	-0.0486442	-0.557578	0.183529	0.00849966	0.407946	0.211612	0.279516	0.183529	-0.353499	-0.750646	-0.376831	0.334823	0.101484
Cluster 2
ProbeSet ID	Gene Symbol	1	2	3	4	5	6	7	8	9	10	11	12	13	14	15	16	17
1417714_x_at	Hba-a1	3.2545	1.13416	-2.37556	-4.82622	-5.41119	-5.56319	-5.14815	-5.41119	-4.41119	-5.14815	-5.27368	-3.68872	-5.03268	-5.03268	-3.20955	2.18947	-5.14815
1448908_at	Ppap2b	0.137859	0.553626	0.458618	-0.438369	0.0181568	-0.509775	0.0802623	-0.277828	-0.158261	0.0464356	-0.101999	-0.5849	-0.155873	0.0690746	-0.189678	0.40138	0.0721344
1448995_at	Cxcl4	-1.1749	2.28085	-0.146804	-1.05072	-0.0732006	-0.426628	-0.115354	-1.1912	-0.0470031	-0.475704	-0.465754	-0.351421	-0.73774	-0.191198	0.114242	-0.0396046	-0.91592
1451618_at	Rho	0.691825	0.419118	0.192369	-0.00768003	-0.0796222	-0.131617	-0.0924462	-0.0782043	-0.207089	-0.0711357	-0.643461	-0.200904	-0.119899	-0.0853077	0.222595	-0.0308072	-0.270445
1416818_at	Parva	0.141706	-0.12346	0.239466	-1.86363	-0.329418	-0.552426	0.789178	-1.78057	0.460436	0.201664	0.333352	0.451874	0.0846964	-1.03958	0.109405	0.300348	0.0224528
1448716_at	Hba-x	1.38218	1.6321	0.932425	-1.37686	-2.46489	-2.44591	-1.60001	-1.93511	-0.876744	-2.24386	-2.70329	-0.623808	-0.860943	-2.33697	0.0212209	2.19569	-2.82065
1450621_a_at	Hbb-y	1.10104	2.72801	0.726129	-3.81869	-4.78393	-5.00632	-4.59128	-5.71682	-0.805559	-2.57633	-5.00632	-1.70051	-1.84533	-4.31827	-0.595046	2.0993	-5.47581
1450736_a_at	Hbb-bh1	1.42368	2.27254	0.566347	-5.58496	-4.53051	-6.11548	-4.33121	-5.2854	-0.436779	-4.47805	-4.47805	-0.893085	-3.30812	-4.53051	0.354843	2.33436	-5.82597
1428361_x_at	Hba-a1	2.37781	0.6233	-0.341426	-1.50675	-1.67421	-1.25514	-1.34063	-1.80507	-0.254388	-2.49067	-1.0203	-1.5561	-1.64031	-1.82958	-0.465138	2.12404	-2.53396
1452757_s_at	Hba-a1	2.51794	0.995629	-0.359367	-2.2507	-2.93484	-1.63909	-1.16978	-4.36618	-0.303359	-3.31254	-1.96763	-1.72408	-1.59359	-3.0097	-0.403549	2.1779	-2.85599
1417184_s_at	Hbb-b1 /// Hbb-b2	3.29072	-2.00024	-3.1114	-2.02311	-1.99054	-0.912203	-2.10441	-3.65835	-1.96185	-3.68938	-1.99377	-2.20171	-2.48502	-2.96501	-3.76448	2.02865	-2.03303
1451408_at	Trub2	0.264915	0.381184	0.421034	0.0485211	-0.235012	0.112912	-0.204372	0.0289333	-0.442303	-0.0618519	-0.419353	-0.116175	-0.400844	0.104299	-0.10448	0.39066	-0.207943
1449077_at	Eraf	0.949863	0.662079	-0.231744	-0.945439	-0.533027	-0.95597	-0.141837	-0.244596	-0.415732	-0.618275	-0.419371	0.0984777	-0.0916252	-0.163031	-0.206377	1.37754	-0.639336
1450366_at	Hrk	0.144948	0.621145	0.485307	-0.31545	-0.186673	-0.141984	0.265964	0.155217	0.0184803	-0.242868	-0.189919	-0.770016	-0.202975	-0.403134	-0.164156	0.558697	-0.433588
1460403_at	Psip1	0.338376	0.341678	0.221363	-0.362831	-0.161097	-0.0230474	-0.462147	-0.0206227	-0.163101	0.24221	0.00161469	-0.0493735	-0.164439	-0.045055	-0.260585	0.236646	0.0241018
1422678_at	Dgat2	0.392057	0.0402027	0.399236	0.17822	-0.0937021	0.0145414	-0.130606	-0.0921525	0.0302775	0.0174153	0.0778586	-0.173385	-0.175025	-0.251661	-0.382864	0.125253	-0.231904
1425806_a_at	Surb7	-0.00873133	0.0866043	0.142433	-0.507218	0.0305703	0.0366791	0.256747	-0.398823	0.240961	0.176029	0.170483	0.0944345	-0.287791	-0.0599567	-0.154225	0.0608589	-0.1335
1436616_at	R74740	0.303222	0.366038	0.257175	0.0678678	-0.139781	-0.202744	0.0656432	-0.134655	-0.0477946	-0.0696357	-0.139781	-0.0239084	-0.466852	0.00424262	0.07894	0.0833452	-0.240784
1448535_at	Elp4	0.365498	0.370082	0.0472384	-0.023151	0.315986	-0.198044	-0.123975	0.377387	0.157421	0.0229908	-0.45593	-0.196687	-0.30799	-0.370856	-0.240742	0.170095	-0.352613
1425674_a_at	Ssu72	0.428023	0.338337	0.267681	0.159543	-0.82493	-0.442133	-0.141141	-0.462139	0.173076	-0.247293	-0.169325	-0.0387961	-0.135569	-0.239968	0.374362	0.276995	0.0546022
1417725_a_at	Sssca1	0.251437	0.207916	0.264426	-0.218048	0.020476	-0.0838333	0.193436	-0.327945	-0.396386	0.306299	-0.433361	0.166011	-0.216758	-0.0466902	-0.123166	0.277299	-0.187406
1426263_at	Igsf4c	0.355279	0.691282	0.804387	-0.187864	-0.45296	-0.446782	0.528343	-0.392334	-0.198205	-0.630646	-0.589226	-0.874203	-0.644721	0.206415	0.323098	0.218129	-0.187864
1428122_s_at	2610528K11Rik	0.208539	0.387845	0.609729	-0.0563788	-0.195337	-0.333374	0.195031	-0.172395	-0.817236	0.0688828	0.0718421	-0.0596136	-0.139506	-0.377096	-0.335333	0.317278	0.00838355
1427371_at	Abca8a	0.205929	0.627185	0.316845	-0.46903	0.245879	-0.58285	0.513452	-0.205996	0.0789814	-0.226874	-0.24806	-0.718202	-0.197728	-0.0905184	-0.105907	0.26395	-0.177264
1427232_at	Tshz1	0.151827	0.635812	0.364095	-0.131527	0.331806	-0.656369	0.220775	-0.129482	-0.000549535	0.151827	-0.4281	-0.079279	-0.418081	-0.474065	-0.562339	0.337731	-0.0694446
1419700_a_at	Prom1	0.582033	0.126977	0.30524	-0.202965	-0.197845	-0.120724	-0.0647619	-0.0521304	-0.111602	0.128336	0.0453677	-0.0777663	-0.154768	-0.0822146	0.0202009	-0.107062	-0.302338
1428076_s_at	Ndufb4	-0.0427273	0.391194	0.201091	-0.123888	-0.177827	-0.0369642	0.130296	-0.194837	0.230059	0.249838	-0.198049	0.219665	-0.45937	-0.230568	-0.151643	0.180627	-0.30019
1422474_at	Pde4b	0.316665	0.374768	0.253176	0.054195	0.136469	-0.237571	0.192929	-0.0806018	0.142853	0.0777086	-0.164815	-0.192675	-0.318571	-0.233431	-0.437341	-0.0475195	-0.141356
1433662_s_at	Timp2	0.484925	0.19692	0.295101	0.54901	0.323298	-0.268078	0.0764603	-0.458971	-0.0732436	-0.68604	0.320969	-0.332607	-0.280402	-0.439099	-0.273347	0.275992	-0.543436
1451140_s_at	Prkag2	0.192317	0.718326	0.320734	-0.26522	-0.187061	-0.241617	0.0679677	-0.687215	0.0272582	0.19015	0.274419	-0.379706	-0.204067	-0.232865	-0.0146334	0.255883	-0.521725
1418461_at	Sh3d19	0.37704	0.33994	0.479151	-0.361283	-0.243979	0.018534	-0.176722	0.167142	-0.0509426	-0.717562	0.335758	0.000155438	-0.109608	-0.503887	-0.109608	0.176525	-0.194756
1418973_at	Blzf1	0.614042	0.479678	0.246365	-0.214712	-0.2483	-0.246757	-0.222278	-0.468121	0.432279	0.0379728	0.0877688	-0.201194	-0.444923	0.0239721	-0.111359	-0.205686	-0.136869
1426039_a_at	Alox12e	0.222707	0.0884057	0.541884	-0.295142	0.263349	0.0162559	-0.231011	-0.27237	-0.411165	0.0984244	-0.27237	-0.514259	-0.110717	-0.221633	0.103408	0.460717	0.0320232
1437666_x_at	Ubc	0.617639	0.485293	0.140229	0.20688	0.14059	-0.648245	-0.783634	-0.508386	-0.0130686	-0.340952	-0.527146	-0.152778	-0.428195	0.302166	0.195135	0.304954	0.0770159
1448838_at	Topors	-0.0841673	0.0868189	0.696622	-0.250344	0.0886363	0	-0.307356	-0.28287	-0.228306	-0.321767	0.0801355	-0.164864	0.170426	-0.312943	-0.43644	0.738124	-0.152647
1427909_at	2410015M20Rik	-0.00377299	0.277251	0.109268	-0.40518	-0.526125	-0.0709546	-0.0843752	-0.279805	-0.0251819	0.127061	-0.0630603	0.0965495	-0.26728	0.0748011	0.325785	0.0806031	0.319005
1428160_at	Ndufab1	-0.00770098	0.275827	0.0846342	0.169224	-0.303551	0.0576672	0.336591	-0.539179	0.0505486	0.185563	0.230351	0.0799804	-0.049157	-0.198048	-0.33739	0.0217178	-0.396154
1438769_a_at	Thyn1	0.0209358	0.704347	0.388117	-0.0569309	-0.157112	-0.402276	-0.0275523	-0.110833	-0.18082	-0.00248313	-0.128353	-0.179415	-0.136511	-0.0672914	0.0737525	-0.0856033	-0.0174723
1435347_at	Stau1	0.184117	0.203895	0.0951321	0.267931	-0.553586	0.136885	-0.0430777	-0.291167	-0.239799	-0.0404899	-0.101216	-0.142243	-0.14502	-0.120217	0.123101	0.261654	0.13917
Cluster 3
ProbeSet ID	Gene Symbol	1	2	3	4	5	6	7	8	9	10	11	12	13	14	15	16	17
1416645_a_at	Afp	-2.35332	-3.55495	-4.55495	3.9012	-5.87688	-5.87688	-5.29192	-3.41745	-5.87688	-2.87688	-2.55495	-5.29192	-5.87688	-1.45061	-3.70695	-0.876878	-2.12199
1426739_at	Donson	-0.522869	0.554814	0.787699	0.93693	0.143283	-0.606045	-0.496838	-0.147781	-0.283261	-0.358793	-0.492875	-0.112385	-0.257816	-0.344438	-0.46932	0.596333	-0.461553
1416646_at	Afp	-0.13493	-2.61298	-2.83537	2.48054	-2.48173	-0.263827	0.756257	-3.30485	0.42097	-1.14731	-1.07456	0.0607949	-2.19794	-0.89677	0.10323	0.609416	-0.435439
1436879_x_at	Afp	-3.31555	-3.31555	-3.73059	3.95124	-3.31555	-3.73059	-3.31555	-3.31555	-2.99362	-3.31555	-3.31555	-3.31555	-4.31555	-3.73059	-3.31555	-2.99362	-3.31555
1455913_x_at	Ttr	-3.82742	-0.367989	-2.24246	3.59324	-4.41238	-4.41238	-2.24246	-2.82742	0.67508	-1.24246	-2.41238	-4.41238	-3.82742	-4.41238	-4.41238	-0.20293	-2.82742
1431419_at	2610524G07Rik	0.263369	0.311593	0.22327	0.443104	0.185367	-0.11625	0.370059	-0.455778	-0.00346654	-0.175058	0.00979536	-0.243091	-0.686878	-0.399596	-1.00347	0.28846	0.1584
1418183_a_at	Pscd1	0.0956132	-0.0352808	-0.203192	0.530752	0.083293	-0.112537	-0.19117	0.309569	-0.051491	-0.0165963	0.038048	-0.0678855	-0.170368	-0.141163	-0.0651401	-0.00339676	-0.218363
1426225_at	Rbp4	-0.242854	-0.0451543	0.133499	1.13829	-0.0451543	-0.497809	-0.404235	0.313789	0.169064	-0.578086	-0.169944	-0.483012	-0.028944	-0.0920978	0.041829	-0.233536	0.0212187
1418729_at	Star	0.124988	0.173112	0.157249	0.638111	-0.0542555	0.141209	-0.0278206	-0.0811838	0.00799986	0.0294602	-0.0645532	-0.185207	-0.437495	-0.263709	-0.235512	-0.149693	-0.0980085
1452744_at	2210016F16Rik	0.031131	0.121329	0.0769347	0.266759	0.042719	-0.189711	-0.0282475	0.13655	0.090397	0.130046	-0.0775752	0.0724193	-0.0209917	-0.262	-0.569036	0.0970813	-0.113136
1437419_at	Bmp2k	-0.173165	-0.314521	-0.323032	1.0293	0.0475776	0.0834431	-0.415573	-0.150265	-0.0234721	-0.35759	-0.154056	0.108978	-0.0872872	-0.0479548	0.344866	-0.169323	-0.127722
1450994_at	Rock1	0.17131	-0.174487	0.143379	0.538483	0.17768	-0.0164792	-0.270213	0.319318	-0.165053	0.00337884	0.0642314	-0.0508161	-0.0495756	-0.348897	-0.381302	0.127564	-0.478944
1449019_at	Akap1	-0.0552136	0.0614106	0.240479	0.513318	0.296662	-0.275831	0.0436115	0.238742	-0.063763	-0.0919034	-0.408377	-0.234224	-0.280806	-0.229407	-0.0573462	0.0963632	-0.127309
1454608_x_at	Ttr	-2.25733	-1.96782	1.12734	2.91926	-2.96782	0.0805434	-1.6199	-2.10532	0.73262	-2.96782	0.0321804	-2.33979	-3.42725	-2.17932	-0.257326	-1.67236	-0.812541
Cluster 4
ProbeSet ID	Gene Symbol	1	2	3	4	5	6	7	8	9	10	11	12	13	14	15	16	17
1425579_at	Gfra2	-0.263727	-0.208308	0.304322	0.186689	0.18077	0.414345	0.446767	0.115561	-0.0555281	-0.290199	-0.187105	-0.603419	-0.112531	-0.0416225	-0.0193079	-0.130816	-0.147474
1421076_at	Sertad3	-0.0602307	0.173949	-0.109633	0.169083	0.228756	-0.023562	0.44747	0.0707654	-0.121507	-0.19802	-0.0949265	-0.282147	-0.00694731	-0.201167	-0.236239	0.119501	-0.086174
1423145_a_at	Tcap	-0.173996	-0.124456	-0.110322	-0.376575	0.5025	0.13824	0.275282	0.21241	-0.418253	-0.790807	-0.0963248	-0.0943363	0.241042	0.0183868	0.105742	0.0402739	0.158394
1429041_at	2610005L07Rik	-0.0345411	0.285798	0.187095	-0.151674	-0.161758	0.133913	0.219642	0.0238231	-0.188016	-0.383187	-0.354816	-0.468229	0.126829	0.323463	-0.31891	0.195019	0.207383
1428258_at	2010107E04Rik	0.150017	0.527493	-0.0297664	0.15539	-0.0831826	0.0962725	0.0311259	0.0331705	-0.289268	-0.173258	-0.277637	-0.427831	-0.143593	0.145434	-0.00587965	-0.169558	0.17351
1432417_a_at	Tspan2	-0.392973	-0.0551879	0.0143291	0.0825006	0.120829	0.290554	0.554655	-0.0531545	-0.293609	-0.0839606	-0.0531545	-0.339954	0.0787966	-0.191674	0.189416	-0.196155	0.00849998
1455457_at	Cyp2c37 /// Cyp2c50 /// Cyp2c54	0.0792315	0.606617	0.0310224	0.254415	0.0690357	0.138938	0.0893557	-0.0152332	0.260401	-0.258873	-0.216686	-0.460721	-0.258873	-0.329049	-0.320088	0.0656211	-0.147683
1451395_at	Ccdc92	-0.171304	0.115827	-0.145425	0.0142517	0.28238	-0.00695056	0.164915	0.261575	-0.483473	-0.111627	-0.265719	-0.0847373	0.197298	0.094267	0.259962	-0.293871	-0.0888417
1456079_x_at	Apex1	0.00734567	-0.135811	0.0168357	0.12806	0.108718	0.288866	-0.168988	0.0509472	-0.364481	0.0436903	-0.476874	-0.276386	0.178912	0.190035	0.00755881	0.124724	0.0492917
1450695_at	Ahr	0.217718	0.300912	0.417345	0.221008	-0.0413696	0.187764	0.0831755	0.090389	-0.367245	-0.743288	-0.884644	-0.280945	-0.010175	0.217718	0.111816	0.0353876	-0.199517
1451382_at	Chac1	-0.0978306	0.344114	0.36948	0.557797	0.174588	-0.0592421	0.192466	0.315033	-0.524503	-0.364346	-0.665515	-0.646322	-0.196746	-0.501326	0.156487	0.397495	-0.312999
1423226_at	Ms4a1	0.376731	0.174669	0.232642	-0.185556	0.213575	-0.0146935	0.606045	0.0619277	-0.198267	-0.764204	-0.58104	-0.757918	0.107398	-0.0373541	-0.0916555	0.430015	-0.423499
1425283_a_at	Mtl5	0.12263	0.394207	0.230922	0.521512	0.359182	0.295052	0.348232	-0.411817	-0.503066	-0.325998	-0.321619	-0.906582	-0.106741	-0.366014	0.0194175	0.0399788	-0.200102
1423524_at	Mastl	0.0261764	-0.0364945	0.069331	0.227556	0.284823	0.0806242	0.242716	0.474414	-0.646066	-0.0735679	-0.454585	-0.495926	0.173206	-0.197677	-0.442411	0.119468	0.122203
1451862_a_at	Prf1	-0.115074	0.212779	0.0790544	-0.181906	-0.0175189	-0.0175189	0.971341	0.514702	-0.325641	-0.850062	-0.388835	-0.432556	-0.000967711	-0.318788	-0.0398867	0.159786	-0.206997
1449362_a_at	Mink1	0.0805708	-0.100955	0.183533	0.29532	0.152139	0.169266	0.245192	-0.0562659	-0.429653	-0.302426	-0.43237	-0.443289	0.393705	-0.135957	0.22119	-0.0531262	-0.182083
1456465_at	B430110G05Rik	0.0189468	0.105872	-0.0619029	0.229536	0.20242	0.109311	0.289883	0.0780599	-0.0794139	-0.319532	-0.36653	-0.45265	0.218433	-0.193424	-0.0218519	0.122986	-0.14141
1452269_at	Spnb3	0.104321	-0.0342169	0.278043	0.196784	0.0524728	-0.0814059	0.256006	-0.0412416	-0.30939	-0.212047	-0.162378	-0.477859	0.0745741	-0.0403617	0.0508221	0.100337	0.0375482
1420083_at	AU016916	0.206462	0.312103	0.117087	-0.0133833	0.283391	-0.190003	0.146613	0.276123	-0.255201	-0.156836	-0.127624	-0.217097	-0.399037	-0.0740097	-0.699791	0.290623	0.084172
1425858_at	Ube2m	-0.160167	0.0416519	0.0660636	0.0805148	0.469862	-0.163001	0.432797	-0.249223	-0.154514	-0.253748	-0.165841	-0.403236	0.0268042	0.0563485	0.103104	-0.0498171	0.0268042
1417428_at	Gng3	0.130925	0.312107	0.367775	0.0409948	0.0845183	-0.022232	0.238877	0.0498052	0.0119837	-0.592268	-0.225136	-0.204036	-0.0107364	-0.397055	-0.0361488	0.205755	-0.307129
1424752_x_at	Zfp71-rs1	0.194027	-0.414874	0.323206	0.336502	0.454014	0.0050296	-0.0265405	-0.0308025	-0.592478	-0.320546	-0.36022	-0.489167	0.155158	0.203129	0.0859874	-0.276864	0.203129
1425238_at	LOC625603	0.245004	0.291989	0.0469477	-0.153545	0.102916	-0.201551	0.141911	0.419124	-0.296831	-0.259654	-0.259654	-0.343944	0.135484	-0.288166	-0.1353	0.184036	0.0537797
1427935_at	2610208E05Rik	-0.0722705	-0.138195	0.117248	0.529688	0.288838	0.121853	0.12759	0.112627	-0.56244	-0.560594	0.14013	-0.398479	-0.00169335	-0.0193335	-0.117692	0.0584021	-0.0526773
1450242_at	Tlr5	-0.193214	0.0537311	0.262577	0.477171	0.44669	0.198977	0.394413	-0.0247709	-0.233779	-0.600273	-0.643342	-0.481536	0.233113	-0.156354	-0.449331	-0.100271	0.115319
1459924_at	Atp6v0a1	-0.0884213	0.621541	0.297055	0.0351178	-0.0253298	0.0804418	0.180969	0.17302	-0.0670827	-0.413937	-0.558642	-0.478203	-0.0932063	-0.0460552	-0.055363	-0.0670827	0.0590364
1452521_a_at	Plaur	0.249426	0.152084	0.473189	-0.1869	0.0254314	-0.10112	0.602143	-0.176539	-0.269821	0.0521076	-0.525166	-0.495889	-0.148425	-0.247961	-0.171387	0.302236	-0.0816564
1422349_at	Ccr1l1	0.393076	0.254226	0.162434	0.183343	0.309954	-0.187406	0.47803	-0.0529554	0.0301859	-0.595748	-0.547581	-0.320889	-0.0257053	-0.217922	-0.134699	0.196259	-0.517746
1452041_at	Klhl26	0.222807	0.24201	0.401693	0.158383	0.0838704	0.0535974	0.234927	0.000294869	-0.358223	-0.601473	0.00696245	-0.939976	0.190955	-0.319129	-0.1585	0.0846586	0.102668
1424619_at	Sf3b4 /// LOC634414 /// LOC666113	0.104705	-0.114058	0.183144	0.390564	-0.099834	0.28422	0.247976	-0.0166446	-0.364143	-0.436031	-0.390954	-0.218721	0.256431	-0.150795	-0.162019	0.00687899	0.13178
1419259_at	Rsu1	0.0562738	0.449404	0.0900317	-0.182014	-0.0272861	0.160653	0.465915	-0.199475	-0.471383	-0.313672	-0.547598	-0.368342	0.228678	0.043607	0.0982216	-0.221603	0.241906
1452120_at	Nat11	-0.142695	0.326491	0.166255	-0.0709392	0.253377	0.073532	0.213281	-0.00911189	-0.322072	-0.237241	-0.0709392	-0.512976	0.0184306	-0.04053	-0.10026	0.210474	-0.0107485
1423241_a_at	Tfdp1 /// LOC664889 /// LOC672007 /// LOC674691	0.0870544	0.362228	0.148617	0.331836	0.0436537	0.204243	-0.283107	0.171792	-0.385288	-0.194973	-0.400565	-0.05583	-0.0975871	0.000971088	-0.123316	0.0337884	-0.122907
1452042_a_at	Tmem144	-0.0063234	0.186322	0.281479	0.144743	0.234685	-0.0734376	0.504967	-0.164585	-0.363217	-0.354247	-0.357231	-0.264681	-0.0204445	-0.108203	0.00301447	-0.209715	0.20667
1415729_at	Pdpk1	0.209492	0.33806	0.312082	0.035783	0.0797851	-0.465248	-0.0804783	0.821987	-0.273852	0.0567935	-0.497216	-0.36405	-0.183477	-0.16309	-0.193091	-0.102309	-0.175288
1450656_at	Gna13	-0.086551	-0.729917	0.295575	0.368312	0.464564	0.675289	-0.0191517	0.250353	-0.149043	-0.52053	-0.759614	-0.145771	-0.0647623	-0.167169	0.0351852	-0.00130368	-0.286383
1438557_x_at	Dnpep	-0.121208	0.0481001	0.0616137	0.0903232	0.160346	0.248461	0.161976	0.179145	-0.108967	-0.169188	-0.301555	-0.460792	0.0463358	-0.0598735	-0.401075	0.277629	0.0920346
1418436_at	Stx7	0.06928	0.0828905	0.157876	0.059926	0.124165	0.327021	0.0699015	0.167779	0.0314945	-0.124698	-0.451255	-0.0191543	-0.18941	-0.0512304	-0.560504	0.0853514	-0.0324328
1417028_a_at	Trim2	0.000392037	0.0687173	-0.0960531	-0.282098	0.0813726	-0.0960531	0.781328	0.0907918	-0.150501	-0.486368	-0.282098	-0.310748	-0.124836	0.0430687	0.310947	-0.110373	0.0813726
1450941_at	---	0.0672023	0.313563	0.415915	0.132035	-0.0551633	0.0397379	0.196412	0.234007	-0.21242	-0.0719174	-0.0468587	-0.272475	-0.366948	-0.126293	-0.636429	0.0135064	0.0179116
1450369_at	Figla	0.0102198	-0.118462	-0.00914548	-0.0975835	-0.236746	-0.0130499	0.573215	0.163377	-0.227644	-0.114262	-0.0729214	-0.0810953	0.00250488	-0.0406811	-0.0287743	0.170279	-0.0851997
1448985_at	Dusp22	0.288957	0.140205	0.196951	0.207768	-0.149616	0.172313	0.0149305	-0.0707051	-0.647521	-0.00678787	-0.134167	-0.379216	-0.0367957	-0.153071	0.175071	0.157046	-0.0707051
1460733_at	AA407659	-0.571957	-0.197581	0.114895	0.307019	0.416928	0.0993887	0.279391	0.164874	-0.519897	-0.136267	-0.443019	-0.419887	0.344119	-0.0145444	-0.211103	0.1987	0.0466092
1460425_at	1700001C19Rik	-0.0715675	0.285984	0.317885	-0.532409	0.555358	-0.234465	0.503341	0.223053	-0.277152	-0.213587	-0.136894	-0.375759	-0.164677	-0.238677	-0.325613	0.0781796	0.0369569
1438711_at	Pklr	-0.0662168	0.334773	0.464298	-0.0513818	-0.162561	-0.0849778	0.170483	0.122228	-0.0221617	-0.634501	-0.358626	-0.409741	-0.0403548	-0.0550763	0.115671	0.141724	0.144948
1425649_at	Slc39a14	0.191586	0.33006	0.0549369	-0.149166	0.00229546	-0.00503408	0.424019	0.0828609	-0.146462	-0.641104	0.0549369	-0.641104	-0.0574108	-0.0523398	0.0144292	0.290694	-0.187567
1420722_at	Elovl3	-0.654369	-0.078097	-0.0225196	0.377764	0.427733	0.265461	0.554031	0.086491	-0.268875	-0.34026	0.0825971	-0.81216	0.23421	-0.00584088	-0.437557	-0.249112	0.0786926
1451362_at	Rab7l1	0.0088467	0.15149	0.222167	-0.0769512	0.247803	0.187261	0.361759	0.12714	0.0579784	-0.202482	-0.127325	-0.760692	-0.0663819	-0.149464	-0.179521	-0.062876	-0.0698964
1416911_a_at	6330407G11Rik	0.0707078	0.289	0.32949	0.314327	-0.034983	0.09492	-0.128169	0.0959635	-0.396574	-0.26616	-0.913456	-0.0499095	0.00667401	-0.160202	-0.250159	0.258568	0.233183
1433451_at	Cdk5r1	0.274517	-0.210256	0.0389941	-0.314536	0.290764	0.176498	0.231399	0.347782	-0.42429	-0.644474	-0.228664	-0.581015	0.06	-0.273348	0.0900181	0.583644	-0.0667378
1435884_at	Itsn1	0.0543759	0.142126	0.191879	0.171733	0.149013	0.0592581	0.1236	-0.155842	-0.53917	-0.122289	-0.535485	-0.0521632	0.237822	-0.081417	0.0147116	0.220492	-0.167202
1450307_x_at	H2afy3	0.0804057	0.104041	-0.0214013	0.301805	0.204032	0.0744359	-0.107001	0.0734385	-0.168205	-0.445703	-0.170566	-0.234589	0.103064	-0.0690622	-0.262022	0.155845	0.171776
1438760_x_at	Adam15	-0.103303	0.39425	0.303122	0.157822	0.395151	0.169453	0.686866	-0.430328	-1.53626	-0.184418	-1.1033	-0.41288	0.284768	0.133197	-0.0240952	0.0209556	-0.218462
1448118_a_at	Ctsd	-0.0888317	-0.00540264	0.173138	0.0950821	0.107291	0.260459	-0.023037	0.0609645	-0.142632	-0.502709	-0.105173	-0.223147	0.078641	0.0329706	0.14331	0.0724269	-0.10107
1460732_a_at	Ppl	-0.00655805	-0.0392053	0.146438	-0.381597	0.132976	0.713423	0.304903	0.020501	0.00334041	-0.183328	-0.0215343	-0.941025	-0.0341343	-0.0961953	-0.0290811	-0.0240455	-0.141828
1421953_at	Crkl	0.213875	0.185151	0.106562	-0.168779	0.231861	0.100981	0.0953786	0.067034	-0.454919	-0.135459	0.179867	-1.4104	-0.142062	0.0526501	0.236959	0.120421	0.0234447
1421481_at	Tnfrsf9	0.0598094	0.39486	0.0151864	0.209247	0.397759	0.446186	0.113715	-0.030861	-0.0465426	-0.485427	-0.135978	-0.427816	-0.231326	-0.590699	-0.165638	-0.0386805	0.0264722
1416773_at	Wee1	-0.391192	0.394983	0.47471	0.435397	0.55372	0.132334	0.033583	-0.227099	-0.430813	-0.483027	-0.398695	-0.99836	0.231252	-0.164648	0.0142512	0.119551	-0.217484
1431844_at	Kcnmb2	0.0600784	0.526915	0.486976	-0.262701	0.205602	0.0221559	-0.216631	-0.44384	-0.224899	-0.533416	-0.196167	-0.405747	0.0325977	-0.12481	0.360064	-0.0203836	0.180781
1449435_at	B4galt3	-0.0412125	-0.132458	0.14442	-0.0671873	0.102484	0.159107	-0.0592323	0.151293	-0.805293	-0.198323	-0.167456	-0.275217	0.0265629	0.0212137	0.284962	0.270607	0.235006
1435170_at	2310007F12Rik	-0.188539	0.326746	0.196529	0.116202	0.16716	0.191067	0.180082	-0.123584	-0.276595	-0.428038	-0.259047	-0.114539	0.0890542	0.0270578	-0.314933	0.321757	-0.219721
1426732_at	---	-0.437359	0.281367	0.0108244	-0.325791	0.433811	0.0240481	0.841895	-0.34947	-0.23478	-0.647719	-0.651919	-0.359739	0.206787	0.13303	0.0984435	0.206787	-0.125617
1432155_at	Wasl	-0.0744248	0.185601	-0.049396	-0.156039	0.0597961	0.142806	0.645854	0.267561	-0.250675	-0.51371	-0.31314	-0.26707	-0.0109219	-0.563463	-0.0672293	0.270404	0.173503
1416041_at	Sgk	-0.280866	0.0542558	1.33103	-0.870936	0.288721	-1.19671	0.0980375	-0.1494	-0.901963	-0.631109	-1.37024	-0.322237	0.557469	0.221934	0.394654	0.00492808	0.166933
1452929_at	Rsn	-0.395445	0.0923742	0.167346	0.0916269	0.467261	0.177946	0.366449	0.177242	-0.874391	0.056825	-0.111091	-0.696054	0.139415	-0.148566	0.072817	-0.113674	-0.084666
1451729_at	Bmpr1a	0.0795817	0.164115	0.108313	-0.0942351	-0.0414337	0.323139	0.300196	0.265995	0.0691801	-0.262699	-0.585285	-0.299967	-0.156347	0.193144	-0.124957	0.14245	-0.456471
1424131_at	Col6a3 /// LOC674521	0.0402698	0.191197	0.248153	0.283096	-0.243991	-0.458115	0.286726	0.157896	-0.26775	-0.128312	-0.197614	-0.464203	-0.13558	-0.212908	0.0637288	0.329581	0.137941
1422715_s_at	Acp1 /// LOC631286 /// LOC668486 /// LOC670469 /// LOC676625	0.258458	0.0891908	0.0633032	-0.0223775	0.148353	0.259861	0.0422534	0.348602	-0.0382432	-0.517646	-0.0283602	-0.211676	-0.00541935	-0.190917	-0.148878	-0.10984	-0.177084
1424286_at	Prkx	-0.059788	0.0261422	0.116489	0.138218	0.0779522	0.0600895	0.149525	-0.182008	-0.238365	-0.201987	0.196067	-0.675678	0.111872	0.0648746	0.10608	0.0322631	0.0492647
1422313_a_at	Igfbp5	0.507335	-0.127173	1.00736	-0.189818	-0.172845	0.814444	0.369305	-0.732716	-0.932486	-0.181306	-0.347523	-0.677808	-0.168632	-0.745207	-0.106881	0.304121	-0.376378
1428942_at	Mt2	-0.0422812	-0.139053	0.620174	0.202075	-0.0765744	-0.10832	0.562979	-0.0519963	-0.237233	-0.188201	-0.191776	-0.447669	-0.137328	-0.0310289	-0.181076	0.182875	-0.191776
1428072_a_at	Dolpp1	-0.0014755	-0.430371	0.072559	-0.0596063	0.285995	0.0524446	0.312427	-0.0532648	-0.173437	-0.264103	-0.124604	-0.2431	0.139292	0.00596632	0.139292	0.128176	0.00664095
1451281_at	Zfp96	0.206541	0.355231	0.462573	0.184311	0.0258214	0.0283196	-0.257863	-0.0859102	-0.288625	-0.132586	-0.467126	-0.230727	-0.0591433	-0.172192	-0.110433	0.179823	0.033303
1448880_at	Ube2l3	0.385153	0.20782	0.247751	-0.00410595	-0.101557	0.103694	0.219992	-0.153114	-0.262635	-0.713755	-0.64799	-0.114872	0.0243678	0.21544	-0.194919	0.370555	-0.0977758
1420728_at	Krt1-2	0.261803	0.272384	0.278395	-0.0904015	-0.0711652	0.0724055	-0.0559588	0.0391582	-0.0846036	-0.565409	0.141641	-0.405086	-0.151718	0.0249268	-0.0315852	0.146579	-0.0465356
1437837_x_at	Poldip3	0.24292	0.214095	0.293543	0.0622126	0.0070144	0.201279	0.00814686	-0.0512972	-0.0992716	-0.0077891	-0.346699	-0.567913	0.0120408	-0.0929169	-0.24576	0.144735	-0.0326748
1418520_at	Tgoln1	0.0462767	-0.412211	0.141273	0.061305	0.263264	0.285832	0.0761782	0.446128	-0.0193994	-0.182424	-0.427864	-0.422628	0.034902	-0.0233574	0.176207	-0.443689	0.0041233
1435140_at	Ide	-0.0270769	-0.0955409	0.322464	-0.0872461	0.414629	0.0935346	0.0175576	-0.320114	-0.311806	-0.265614	-0.168666	-0.417766	0.124473	0.277292	0.171647	-0.151269	0.10185
1416579_a_at	Tacstd1	-0.733324	-1.26766	3.02664	-0.996358	-0.510932	-1.17145	-0.733324	-0.699377	-0.292751	-1.17145	-0.633788	-1.26766	-0.803713	-0.877714	-0.916188	-1.03818	-0.955716
1456213_x_at	Qars	-0.0799988	-0.17831	0.063404	0.260812	0.0140482	0.240929	-0.059424	0.166386	-0.273972	-0.648973	0.132252	-0.346897	0.1482	-7.95333e-05	0.195014	0.019394	0.05692
1422806_x_at	Ing3	-0.12706	-0.120705	-0.0986782	-0.061684	-0.20896	0.482115	0.351069	0.0719406	0.00376907	-0.775502	-0.205593	-0.310182	0.168514	0.0495728	0.278391	-0.169068	0.216991
Cluster 5 or "Wnt cluster"
ProbeSet ID	Gene Symbol	1	2	3	4	5	6	7	8	9	10	11	12	13	14	15	16	17
1420360_at	Dkk1	0.553641	0.63027	0.189957	-0.874787	-1.7781	-1.76531	-1.60287	-2.28627	-1.40306	-0.944376	-0.363959	-0.191477	0.629598	1.19406	0.714114	0.607091	0.704055
1418129_at	Dhcr24	-0.138845	-0.213946	-3.54693	-1.51945	-3.34048	0.352544	-1.92544	-1.99944	-2.66241	-0.618012	-2.60351	-2.92544	3.13741	-0.0575445	-0.304855	-2.49248	0.074559
1417937_at	Dact1	-0.0486853	0.0838534	-0.056039	0.121021	-0.100626	-0.330186	-0.309182	-0.184143	-0.418248	-0.199983	-0.0975647	0.129657	0.276436	0.378969	0.18023	0.0758417	0.21712
1420705_at	Foxb1	-0.0465283	0.0221134	0.0623505	-0.267393	0.0308306	-0.417419	0.566684	-0.593781	-0.607243	-0.177627	-0.321841	-0.734414	0.745021	0.473841	0.2754	0.171491	-0.177627
1422914_at	Sp5	0.602919	0.431448	0.668909	0.069337	-0.683315	-0.440524	-0.214217	-1.31303	-0.884601	-0.525294	-0.44445	-1.1061	0.481963	0.407691	0.299183	0.185661	0.425008
1437267_x_at	Hnrph1	-0.0543521	-0.174252	-0.066514	0.132795	0.0702954	0.131465	-0.0468027	-0.0543521	-0.52442	-0.0864984	-0.401863	-0.195797	0.146031	0.0194214	0.524035	-0.111481	0.347378
1448289_at	Crmp1	0.270995	-0.114431	-0.601813	0.120469	-0.12205	-0.45851	-0.00472666	-0.133004	-0.455757	-0.500452	-0.293339	-0.284763	0.508034	0.0972215	0.772713	-0.12205	0.460729
1421640_a_at	Tank	-1.28773	-0.355747	-0.441139	0.0060854	0.0060854	0.0568005	-0.628766	0.210298	-1.28773	-0.616793	-0.448194	-0.473161	0.960198	0.0392523	-0.262638	0.0961268	1.50052
1418356_at	Mpst	-0.19379	-0.21749	-0.30682	0.061388	0.149719	-0.259925	0.332197	-0.275388	-0.167585	0.0954498	-0.287879	-0.0889748	0.460956	0.485017	0.102645	-0.332469	0.031538
1436687_x_at	Zfp706	-0.327376	-0.539215	-0.359509	0.442265	-0.340143	-0.554012	0.906771	0.126846	-1.41246	-1.1427	-0.182381	0.181466	0.317751	0.389107	0.221115	-0.247034	0.61426
1425212_a_at	Tnfrsf19	0.26885	0.573849	0.518553	-0.0968189	-0.737716	-0.749916	-0.371326	-0.558037	-0.977252	-0.0552213	0.0639875	-0.351825	0.351116	0.67846	0.137029	-0.187939	0.18855
1425087_at	2310003F16Rik	0.0844769	-0.245444	-0.0403295	0.295437	-0.00174103	-0.472854	-0.0889395	-0.0359906	-0.260551	-0.582479	-0.148582	-0.409744	0.127663	0.550415	-0.0844521	-0.0446816	0.708752
1434507_at	Npepl1	0.171531	-0.19538	0.1268	-0.054782	-0.227286	-0.0732193	0.0659701	-0.186572	-0.224707	-0.172838	-0.180313	-0.142102	0.108512	-0.0582211	0.556653	0.101337	0.139865
1438133_a_at	Cyr61	-0.0836083	-0.0570235	0.552051	-0.261294	-0.215344	-0.416413	-0.119129	-0.416413	-0.245045	-0.665478	0.155493	-0.352848	0.164211	0.619528	0.380132	0.178049	0.0745733
1417098_s_at	Mecr	0.134625	0.127875	0.124489	-0.597299	-0.104701	0.221196	-0.0908572	0.000652115	-0.116674	-0.132793	-0.0751969	-0.0292107	-0.0443771	0.251008	0.110862	-0.0160696	0.0443183
1427600_at	Tnfrsf19	0.475858	0.121181	0.185769	-0.698191	-0.51742	-0.972758	-0.699881	-0.595505	-0.51593	-0.582973	-0.0215976	-0.0311414	0.601264	0.444066	0.397398	0.520819	0.402921
1424942_a_at	Myc	0.320747	0.372852	0.252852	-0.0826341	-0.105518	-0.592204	-0.361858	-0.609942	-0.2189	-0.480574	0.123748	-0.328435	0.316058	0.313707	0.319966	0.0662697	0.0690593
1436845_at	Axin2	0.342041	0.195306	0.151585	0.215047	-0.238627	-0.380164	-0.431032	-0.411982	-0.364209	-0.317375	-0.141293	-0.191303	0.085202	0.420653	0.300682	-0.00279165	0.281697
1452675_at	Rbm22	0.00683151	0.158946	-0.13346	-0.249756	-0.222074	-0.105493	-0.570354	-0.0863522	-0.0499748	0.149895	0.0431346	0.0785465	0.284644	0.398565	0.0646999	-0.0592751	0.0289422
1438206_a_at	2610042O14Rik	0.557041	0.178011	-0.00883261	-0.19213	-0.167496	-0.161403	-0.282702	-0.0260755	-0.230739	-0.0390511	-0.304919	-0.116702	0.0278938	0.184086	0.174804	0.0409884	0.0962841
1416039_x_at	Cyr61	0.060681	0.164489	0.474237	-0.554214	-0.193493	-0.537674	-0.0651193	-0.347461	-0.0868307	-0.333118	-0.0426686	-0.228058	0.169992	0.138528	0.492653	0.270748	0.0861294
Cluster 6
ProbeSet ID	Gene Symbol	1	2	3	4	5	6	7	8	9	10	11	12	13	14	15	16	17
1426106_a_at	Syt6	-0.93023	-0.187086	-0.29457	-0.29457	0.153951	-0.286621	0.640212	-0.0597062	0.185724	0.378012	0.216811	0.216811	0.225175	0.162686	0.0604525	-1	-0.114936
1439421_x_at	Cbx3 /// LOC633016	-0.251772	-0.264087	-0.257917	-0.263572	-0.2023	0.318038	0.267061	-0.00811326	0.446406	-0.0850014	0.24188	0.151465	-0.128436	0.129665	-0.0886474	-0.332417	0.00349197
1434363_x_at	Paxip1	-0.430819	0.13075	-0.343497	0.050487	-0.221171	-0.262228	-0.311101	-0.214957	0.0811114	0.367247	0.536405	0.219074	-0.0109883	0.0112691	-0.180241	0.173221	0.0112691
1448287_at	Rpo1-3	-0.444254	0.256413	-0.241067	-0.283464	-0.0932248	-0.207842	-0.131004	-0.175365	0.387952	0.20337	0.0223172	0.176361	0.0878926	-0.0081433	0.210215	-0.050875	0.0227061
1423761_at	5630401D24Rik	-0.453537	-0.106404	-0.504163	-0.0384998	0.0693035	0.0997573	0.293344	-0.719892	0.0922039	0.416402	0.243071	0.634901	-0.16856	0.147913	-0.0805639	-0.191424	-0.409981
1418206_at	Sdf2l1	-0.11655	-0.0879812	0.0602452	-0.518115	0.131265	0.165066	-0.246167	0.0677888	0.177321	0.0611903	0.165944	0.266885	-0.0385478	0.00532467	0.0488555	-0.30828	-0.0446351
1424108_at	Glo1	-0.52923	-0.676642	-0.762552	-0.504999	0.301094	-0.332353	-0.582049	0.932602	0.413288	0.490826	0.022608	-0.281066	0.211719	0.477238	0.295192	-0.625635	-0.352506
1417986_at	Nrarp	-0.678956	-0.642854	-1.08221	-0.109798	0.1571	0.18415	0.134366	-0.00114899	0.6213	0.426009	0.513921	0.400412	-0.373975	-0.256652	-0.554662	-0.464685	0.426748
1417985_at	Nrarp	-0.35247	-0.454015	-0.427531	-0.0301345	0.0225659	0.0978818	0.151005	0.115231	0.211026	0.186646	0.451194	0.255739	-0.174539	-0.12516	-0.242986	-0.269526	0.201819
1426533_at	Nol5a	-0.205646	-0.185064	-0.380052	0.0082561	-0.0371343	0.0121291	-0.086698	-0.129281	0.125289	0.249601	0.363124	0.199973	-0.0282871	-0.0397467	0.104776	0.00876187	-0.166863
1427987_at	Safb2	-0.643712	-0.184787	-0.840341	-0.361312	-0.922428	-0.314007	-0.741657	0.00659124	0.36046	0.414959	-0.0887677	-0.0166641	0.22365	0.390689	0.957865	-0.270351	0.498089
1417278_a_at	Nkd1 /// LOC634379 /// LOC671838	-0.256896	-0.248699	-0.216368	-0.341536	0.182594	0.075679	-0.119766	0.351172	0.239061	0.20664	-0.00831995	0.477601	-0.142368	-0.134795	-0.093838	-0.123509	-0.161477
1424322_at	Apex2	-0.341664	0.111612	-0.241864	-2.41923	-0.212495	-0.564719	0.217905	-0.496762	-0.124391	0.111612	0.359081	0.363963	0.361524	0.361524	0.527375	-0.194438	0.304257
1417259_a_at	Capzb	-0.0349787	-0.053211	-0.10792	-0.180287	-0.367007	-0.184003	-0.178804	-0.116415	0.398229	-0.0209557	0.243075	0.0235391	0.0280425	0.238086	0.20267	-0.287317	0.157582
1450039_at	Usp9x	-0.39766	-0.221601	-0.112803	-0.177093	0.154301	-0.0247243	-0.432114	-0.545414	0.440373	0.35707	0.326482	0.107092	-0.0181666	-0.0181666	-0.031312	0.180192	-0.00513991
1425831_at	Zfp101	-0.741569	-0.376374	-0.902233	-0.146506	0.418184	0.0101866	0.0241643	-0.078782	0.500478	-0.0120559	0.449597	0.116528	0.445151	-0.0916441	0.183897	-0.782694	0.0181904
1430980_a_at	Eif4a1	-0.358692	-0.143777	-0.471201	-0.291115	-0.174454	-0.340136	0.0962178	-0.403962	0.298161	0.0496448	0.120476	0.338773	-0.244489	0.375469	0.362397	-0.298831	0.505204
1420171_s_at	Myh9	-0.197075	-0.0862047	-0.311284	0.0528539	-0.117757	-0.530738	0.148361	-0.16376	0.216059	0.240347	0.206228	-0.0222057	0.193844	0.11897	0.290059	-0.474312	0.103165
1431125_a_at	Tarsl1	-0.372711	-0.40968	-0.375595	-0.51281	-0.178866	0.145412	-0.143201	-0.103606	0.105977	0.164071	0.34725	0.355971	-0.365047	0.219278	0.471225	-0.14402	0.259495
1452506_a_at	Ilkap	-0.546118	-0.0358475	-0.629002	-0.0624826	0.123426	-0.290861	-0.0974666	-0.233528	0.169933	0.191563	-0.290861	0.155698	0.2921	0.0881117	0.380446	-0.172848	0.452986
1454890_at	Amot	-0.303066	-0.203317	-0.386299	-0.0850444	0.153268	-0.133109	-0.482514	-0.00667336	0.910446	0.0268111	0.0214777	0.0667586	-0.0572994	0.0721518	0.0177558	-0.11742	-0.0428956
1422623_x_at	Rpl41	-0.0801905	0.0862707	-0.29543	-0.400841	-0.382769	-0.0338495	-0.318817	0.0222391	-0.0147003	0.697336	0.309343	0.266283	-0.175067	-0.0441246	0.13212	-0.0927542	-0.12547
1427125_s_at	Lrrc41	-0.472769	-0.12741	-0.102719	0.149668	-0.089722	-0.566441	-0.279597	-0.53307	0.134518	0.753234	0.149668	0.250208	0.248929	0.204775	-0.101088	-0.286996	0.0267501
1415999_at	Hey1	-0.0573243	-0.487572	-0.342782	-0.358049	0.0841383	0.0214743	0.23202	0.305147	0.0889715	0.119211	0.154989	0.425303	-0.140677	0.0240002	-0.0230252	-0.239203	-0.13503
1426467_s_at	0610037L13Rik	-0.44471	0.17079	-0.503113	-0.0406565	-0.0534351	-0.194923	-0.175237	-0.233665	0.33472	0.297968	0.0565024	0.273618	0.0215919	0.26438	-0.0141843	-0.061157	-0.0229545
1428563_at	Ddx10	-0.557171	-0.123612	-0.394831	0.0682832	0.0212926	-0.133246	-0.138087	-0.176168	-0.296841	0.889531	-0.140514	0.437958	0.157908	0.0277913	0.0353362	-0.208901	-0.121213
1424153_s_at	Sall4	0.401402	-0.983756	0.0506824	-0.443848	0.24526	-0.491105	-0.966956	-0.671577	-0.70253	1.34407	-0.0277212	1.61801	-0.761062	-0.144469	-0.435157	-1.24215	-0.983756
1420978_at	Nrf1	0.135315	-0.399498	-0.786828	0.241639	-0.0944526	-0.360077	-0.456561	-0.174253	0.30432	0.301864	0.246755	-0.0188356	0.213172	0.149042	0.5225	-0.730446	0.140821
1438674_a_at	Sfrs8	-0.143461	-0.124319	-0.345866	0.186921	-0.203801	-0.328236	0.193038	-0.458021	0.408145	0.098436	0.0809486	0.181803	0.135966	0.10494	-0.083078	-0.187815	0.176667
1425798_a_at	Recql	0.0948553	-0.150757	-0.297884	0.378528	-0.306762	0.0641948	-0.107453	-0.569796	0.386811	0.275229	0.443501	0.930817	-0.50706	-0.0997172	-0.776247	-1.0319	-0.0466988
1427058_at	Eif4a1	-0.152176	-0.169944	-0.359469	-0.443061	-0.269807	-0.387199	0.138326	-0.139823	0.343846	-0.108618	-0.0656489	0.320476	-0.226138	0.377598	0.488285	-0.42814	0.478137
1416079_a_at	Arpc1a	-0.150292	-0.242738	-0.179004	-0.293635	-0.0547419	-0.0225126	-0.0870274	0.197834	0.205074	0.0602747	-0.127028	0.0725062	-0.101383	0.265988	0.371724	-0.389363	0.219446
1415740_at	Psmc5	-0.349107	-0.144478	-0.484879	-0.246266	-0.1888	0.234856	-0.219833	-0.194175	0.059002	-0.0345928	0.389191	0.272798	-0.102881	0.068011	0.378971	-0.254354	0.391385
1415891_at	Suclg1	-0.0745574	-0.199543	-0.373777	0.127836	-0.029618	-0.0311359	-0.149506	0.0288508	-0.103273	0.103834	-0.241096	0.444495	0.114627	0.0631595	0.154341	-0.253739	0.193424
1417018_at	Efemp2	-0.649723	-0.454221	-0.425321	-0.956338	0.118914	-0.44046	0.159642	0.252939	0.525666	-0.592801	0.619894	0.172634	0.00171412	0.319155	0.417312	-0.376462	0.163652
1434393_at	Usp34	-0.711284	-0.418967	-0.624732	-0.0930309	0.249971	-0.288983	-0.149875	0.200513	-0.106136	0.7386	-0.36642	0.609369	0.0587943	0.385092	-0.101953	-0.304005	0.0126979
1420772_a_at	Tsc22d3	0.13373	-0.0609702	-0.305473	-0.167182	-0.0609702	-0.456033	-0.550425	-0.485179	0.176235	0.299567	1.01905	0.72029	-0.17904	-0.13603	-0.482728	-0.535105	-0.111205
1423137_at	Rala	-0.018089	-0.0119968	-0.124564	-0.046994	-0.208283	-0.385464	-0.311586	-0.113107	-0.262396	0.861401	-0.0481623	0.122498	-0.0745046	-0.00896038	0.107187	-0.130739	0.181171
1418275_a_at	Elf2	0.170243	0.25316	-0.446039	-0.621125	-0.181511	-0.544295	-0.151977	0.00702494	0.293434	0.0884685	0.257568	0.0934092	-0.0301053	0.10324	0.0483213	0.0278209	0.224171
1452586_at	Anapc13	-0.290028	0.435548	-0.28085	-0.105972	-0.221693	-0.162504	-0.183219	-0.0660059	0.21349	0.341919	-0.0863303	0.372723	-0.0625412	-0.0360461	-0.129176	0.0765058	-0.112471
1438161_s_at	Rfc4	0.119872	0.123423	-0.214753	-0.19398	-0.0907176	0.0794106	-0.120741	-0.193489	-0.178352	0.250824	0.347784	0.468726	-0.12729	-0.369194	-0.0698415	0.0306551	-0.145218
1418527_a_at	Fusip1	-0.170049	-0.0168518	-0.242091	-0.149813	-0.0788294	0.207435	-0.151199	0.0838209	0.123349	0.501508	0.0425726	0.312765	-0.175682	-0.065696	-0.340677	0.0150219	-0.158152
Cluster 7 or "Notch cluster"
ProbeSet ID	Gene Symbol	1	2	3	4	5	6	7	8	9	10	11	12	13	14	15	16	17
1456010_x_at	Hes5	-0.508727	-0.905386	-1.07988	-0.0144098	0.14398	1.50164	1.13291	1.14618	0.135129	0.790833	-0.609254	-1.70137	-2.23189	-1.23189	-0.4677	-2.25497	-0.749735
1417065_at	Egr1	-0.268227	-0.586016	-0.105321	0.0701887	0.335407	0.821769	0.625112	0.472712	0.103892	0.159194	0.0936054	-1.08473	0.0728094	-0.490067	-0.843275	-0.178231	-0.666777
1418446_at	Slc16a2	0.158354	0.061736	0.0269706	0.328928	0.0397097	0.0076485	0.0460373	0.262555	0.107832	0.107832	0.354645	-0.389134	-0.527918	-0.246981	-0.220157	0.0834311	-0.625106
1422948_s_at	Hist1h4h /// Hist1h4c /// Hist1h4i /// Hist1h4j /// Hist1h4k /// Hist1h4m /// Hist1h4a /// Hist1h4b	0.119307	0.129002	-0.298652	0.183987	0.278491	-0.238823	0.454598	-0.270338	0.196029	0.343227	0.0898229	0.261843	-0.607641	-0.283139	-0.142366	-0.0807228	-0.726746
1438390_s_at	Pttg1	0.37014	0.219668	0.00363513	0.228749	0.143704	0.368262	0.0936874	-0.119691	0.0571624	-0.0533443	0.113032	0.403534	-1.31732	-1.4992	-0.179651	0.00846635	-0.0992631
1427572_at	Lrrc51	-0.265085	-0.105819	0.157895	0.243559	0.333466	0.137382	0.770871	0.246755	-0.368853	0.0559322	-0.011182	-0.507335	-0.715443	-0.246995	-0.0226776	-0.388549	-0.0342656
1418102_at	Hes1	-1.09287	-0.797012	-0.979876	0.89881	0.610606	1.06203	0.984852	0.853436	0.425067	0.0460225	-0.579012	-0.931741	-1.56277	-1.45275	-1.18837	-0.313989	-0.582787
1416029_at	Klf10	0.0415906	-0.413653	-0.0335341	0.298001	0.324566	0.255242	0.361687	0.355567	-0.12986	0.300553	0.0672863	0.0247168	-0.574979	-0.486554	-0.717401	0.0293384	-0.36029
1416895_at	Efna1	-0.375387	-0.689022	-0.438006	0.397544	0.0175974	0.440944	0.225825	0.721111	0.501309	0.13287	-0.0618874	0.0865892	-0.884468	-0.32042	-0.347642	-0.8045	0.180096
1419935_s_at	Csnk2a2	-0.136643	0.101968	0.052755	0.084266	0.260116	0.390074	0.316169	-0.00528562	0.147428	-0.170776	0.172776	-0.27259	-0.247155	-0.318946	-0.517492	0.112922	-0.330772
1423820_at	Elof1	-0.12875	-0.213998	-0.173995	-0.0238637	0.348488	0.310037	0.0766491	0.628646	0.0486883	-0.443797	-0.0223983	-0.131907	-0.0411947	0.056683	-0.242291	-0.352589	-0.101032
1427699_a_at	Ptpn11	0.216343	-0.252689	-0.84993	-0.61177	0.429453	0.799342	0.46953	0.296514	0.646028	1.32136	0.0478898	0.156222	-1.53047	-1.49148	-1.49148	-1.61177	-1.01985
1434391_at	Hnrpu	-0.386293	-0.0999744	-0.243955	0.244397	0.321481	0.187681	0.32014	-0.171112	0.161963	0.129666	0.0660225	0.0526269	-0.0264826	0.0924462	-0.244616	-0.238017	-0.492254
1451313_a_at	1110067D22Rik	-0.164941	-0.400499	-0.113449	0.691646	0.244077	0.141836	0.0327462	0.292603	0.0601011	-0.0235708	-0.00977439	0.00874069	0.205736	-0.252745	-0.212684	-0.86702	-0.241185
1460246_at	Mecp2	-0.078634	0.0261237	-0.0968578	0.588075	0.229953	0.205374	0.125884	0.186411	-0.243437	0.098383	-0.0511305	0.0159837	-0.779829	-0.465379	-0.544873	0.141515	0.0768659
1424406_at	Bcl2l13	0.0884701	-0.240321	-0.432677	0.245539	0.36872	0.171424	0.213397	0.183542	-0.174081	0.00728673	-0.211276	-0.00813414	-0.0527436	-0.225225	-0.246404	0.0284348	0.0275948
1429109_at	Msl2l1	-0.02136	-0.192194	-0.0519657	0.0983042	0.100532	0.455911	0.624868	0.211893	-0.22809	-0.423934	0.367087	-0.367412	-0.46948	-0.277868	-0.205895	0.0344779	-0.221118
1429908_at	6530403A03Rik	0.19325	-0.240846	0.0749298	0.245311	-0.363589	0.21206	-0.0811894	1.09534	-0.319701	-0.113611	-0.00101903	-0.104273	-0.391713	-0.308935	-0.205472	-0.36917	-0.170944
1456005_a_at	Bcl2l11	-0.376178	-0.45643	0.232631	0.602017	0.147563	0.167671	0.286515	0.315037	0.0151574	0.240549	0.0605927	-0.408219	-0.233298	-0.201681	-0.482539	-0.186015	-0.304318
1426526_s_at	Ovgp1	-0.0342656	0.0442267	-0.0719853	0.0847871	0.197405	0.30432	0.584428	0.0733143	-0.448269	-0.0127095	-0.097691	-0.0879976	-0.187993	0.00249293	-0.856433	0.121456	-0.10745
1423356_at	Snap29	-0.016601	-0.359203	0.170167	0.457049	0.298272	0.361008	0.0961669	0.0453859	-0.38926	0.364615	-0.344406	-0.247621	-0.253138	-0.201559	-0.1647	-0.0813713	-0.1647
1429457_at	2310020A21Rik	-0.288159	0.302167	-0.316648	0.208165	-0.124516	0.164663	0.740766	0.0577479	-0.0104236	0.103006	-0.0491673	-0.204019	-0.221228	-0.371095	-0.211642	0.124358	-0.40784
1453576_at	Nipbl	-0.0690674	0.0449237	0.182195	0.112154	-0.441523	0.0999378	0.309656	-0.0109463	0.239002	0.0563485	0.310717	0.169392	-0.3151	-0.0349918	-0.237097	0.077685	-1.02559
1451271_a_at	Acat1	-0.227543	-0.0956557	-0.0146948	0.174488	-0.580632	0.0498055	0.304678	0.22402	0.52999	0.33338	0.289248	-0.00198377	-0.827379	-0.00832529	-0.497995	0.176353	-0.590113
1418007_at	1810007M14Rik	-0.33231	-0.677795	0.19507	0.0967717	0.715026	0.101575	0.396676	0.270739	-0.0908744	-0.301184	-0.222753	-0.071436	-0.314833	-0.0109368	-0.608918	0.113853	0.0506797
1450743_s_at	Syncrip	-0.928016	-0.413141	-1.1494	0.561286	0.548327	1.21141	0.192097	-0.408923	-0.214173	0.753259	-0.604881	0.101854	0.123858	-0.38594	-0.704762	-0.264734	-0.877598
1425895_a_at	Id1	-0.636913	-1.41463	-1.17552	0.189364	0.241542	0.542296	0.671378	0.589124	0.401687	0.281798	0.179877	0.302346	-1.06505	-0.599869	0.127729	-0.374811	-0.397626
1451640_a_at	1500011J06Rik	-0.189482	-0.133976	-0.22407	0.368524	0.248346	0.291135	-0.151332	-0.183332	0.143275	0.389304	0.177129	0.239634	-0.100932	-0.365653	-0.246626	-0.310385	-0.342419
1418250_at	Arfl4	-0.823879	-0.443275	-0.561634	0.38202	0.248257	0.298048	0.182027	0.36135	0.0114385	0.358746	0.224991	0.0357745	-0.368865	-0.172986	-0.513119	-0.0173694	0.068022
1452378_at	Malat1	-0.224769	-0.491951	-0.297922	-0.114078	0.115905	1.04133	0.680126	-0.834096	0.132166	0.0489636	0.0939344	-0.364806	0.204009	-0.285869	-0.342165	-0.295503	-0.250304
1422769_at	Syncrip	-0.800464	-0.17049	-0.693785	0.375142	0.5025	0.536915	0.359696	-0.598759	0.182915	0.549936	-0.214951	0.0388765	0.124926	-0.0724504	-0.455259	-0.443598	-0.291853
1419834_x_at	Mark1	-0.3735	-0.352087	-0.442542	0.0479277	0.479731	0.100323	0.21595	0.192461	-0.0148305	-0.0793432	0.291876	0.127254	0.0539557	-0.146876	-0.127419	-0.221362	-0.0937095
1424207_at	Smarca5 /// 9230115A19Rik /// LOC675704	-0.441388	-0.362526	-0.510472	0.245768	0.38634	0.398548	-0.0527014	-0.278977	0.0599604	0.13958	0.291983	0.102373	0.14792	-0.0386423	-0.207847	-0.0259421	-0.298553
1418188_a_at	Malat1	-2.49938	-0.461242	-1.86379	0.784263	0.826839	0.525103	0.844708	-1.32564	0.711932	0.199741	0.391394	-0.262338	0.477903	-0.682241	-0.754703	-0.679806	-0.923028
1452467_at	Mmab	-0.54892	-0.231809	-0.734711	0.0320293	0.719115	0.445056	-0.0421828	0.195241	-0.0128672	-0.207883	0.0794647	0.383393	-0.0253581	0.258435	-0.193716	-0.797599	-0.198423
1448518_at	Timm22	-0.0458993	-0.210958	-0.139875	0.252442	0.0155915	0.388504	0.0565218	0.159685	-0.485698	-0.0415733	0.00517493	-0.114665	0.027993	0.00726428	0.0625624	-0.16789	0.027993
Cluster 8
ProbeSet ID	Gene Symbol	1	2	3	4	5	6	7	8	9	10	11	12	13	14	15	16	17
1424154_a_at	Hbld1	-0.53253	-0.0917872	-0.0523234	0.228707	0.250538	0.136394	0.095024	-0.119521	-0.123178	-0.172213	-0.0465248	-0.148418	0.194839	0.218148	-0.026982	-0.194483	0.160158
1448218_s_at	Ywhaz	-0.589969	-0.467438	-0.396991	-0.0478195	-0.167458	0.245093	0.144197	-0.108544	0.471001	-0.772185	0.174312	-0.72315	0.259212	0.431189	0.515637	-0.112844	0.228948
1456471_x_at	Phgdh /// LOC382931 /// LOC384524 /// LOC385344 /// LOC547171 /// LOC627427 /// LOC666422 /// LOC666875 /// LOC668771 /// LOC669671 /// LOC669985 /// LOC670155 /// LOC670187 /// LOC671102 /// LOC671972 /// LOC673015 /// LOC675010	-2.42992	-4.18357	-2.41507	1.12318	-2.34774	-1.79926	-1.50131	-2.24789	0.747171	-1.29468	1.0218	-2.72109	1.24659	-2.36666	1.78383	-1.77378	1.47265
1435843_x_at	Mrps9	0.0826441	-0.709591	-0.119894	0.00153451	0.156316	0.160993	-0.344494	-0.0230077	0.0290808	-0.227827	-0.189621	-0.0918067	0.342114	0.0973573	0.409166	-0.373505	0.353054
1423995_at	Kif1b	-0.533853	-0.59916	0.114139	0.22843	0.36889	0.373498	0.142492	-0.0111916	-0.0712871	-0.176469	0.1618	-0.0513875	0.0975243	-0.0927355	-0.0838651	-0.206413	-0.0378641
1450323_at	5730493B19Rik	-0.255616	-0.550839	0.164546	0.436506	0.117752	0.287677	0.325919	-0.395689	-0.113918	-0.217615	-0.185471	-0.337474	0.135478	0.151054	-0.0280987	0.015099	0.0445858
1452322_a_at	Brwd1	0.447886	-2.89268	0.156954	0.110925	0.301095	0.206618	0.127025	0.209981	-0.0149325	0.0744919	0.0763356	0.0199731	-0.302913	-0.0832623	0.0763356	-0.0346957	-0.366608
1438082_at	2310028N02Rik	-0.403238	-1.08404	-0.362899	-0.792151	-0.39508	0.029418	1.36101	-0.16265	-0.00121357	-0.719043	-0.0240975	-0.496166	0.149551	0.339171	0.177172	0.274152	0.214974
1451357_at	E130307M08Rik	-0.844062	-1.01908	0	-0.0681235	-0.224376	0.18435	0.151259	0.245205	-0.327422	-0.0327088	-0.0266374	0.0980728	0.214778	0.200939	0.426792	0.0714333	0.23387
1427356_at	2310031A18Rik	-0.367864	-0.395345	-0.226962	0.191928	-0.00832199	0.495738	0.257362	0.0140458	-0.453733	-0.316065	-0.0678788	0.195386	-0.0845576	0.212554	0.265062	-0.145958	0.0270432
1450632_at	LOC433749 /// LOC631743	-0.330675	-0.451105	-0.180734	-0.0265934	-0.0459451	0.1467	0.0182299	0.135441	-0.105608	-0.304679	-0.10454	0.114034	-0.0347098	0.337999	0.237115	-0.0583023	0.369477
1423847_at	2810406C15Rik	-0.485982	-0.509328	-0.356454	-0.0257706	-0.0164488	1.04539	0.00750966	-0.320065	0.0677674	-0.323126	0.154508	0.0442031	0.0148021	-0.155502	0.108101	-0.0668758	0.0412303
1416358_at	0610009O03Rik	-0.35341	-0.48806	-0.457033	0.163304	0.000723271	-0.0206671	0.0195968	-0.09634	0.00295655	-0.15613	0.129974	0.0832475	0.230599	-0.0493043	0.314808	0.0479929	0.321981
1460642_at	Traf4	-0.418998	-2.4975	-0.348822	-0.0415236	0.211675	0.182351	0.0587038	0.0522343	0.326035	-0.0659471	0.167462	0.492978	-0.41451	0.211675	0.391564	-0.396699	0.296232
1424882_a_at	Nt5dc2	-0.198204	-0.362007	-0.209742	-0.129922	-0.261511	0.0968695	-0.11624	0.0108545	0.084914	-0.109813	0.138182	0.0623286	0.0244388	0.0509019	0.45801	-0.0624191	0.28878
1425424_at	MGC7817	-0.0650748	-0.376349	-0.280678	-0.178285	-0.163639	-0.136826	0.430317	0.0344608	-0.11251	0.048906	-0.0611914	0.0106746	0.103553	0.0649857	0.215033	-0.0515283	0.288393
1449261_at	Pbx2	-0.323233	-1.09476	-0.485708	0.0240803	-0.146684	0.430706	-0.735428	-0.420332	0.360696	-0.0236728	0.278702	-0.135398	-0.13915	0.577384	0.176754	-0.476185	0.816984
1424604_s_at	Sumf1	-0.477871	-0.401922	-0.575816	0.353944	0.0522153	-0.218555	0.22642	0.202288	0.101511	-0.0768266	-0.0980744	-0.242014	-0.0937997	0.574099	0.149177	-0.423217	0.353944
1432207_a_at	Toe1	-0.483318	-0.347696	-0.560315	0.177196	0.0667532	0.0790614	0.168994	0.324776	0.296443	-0.445048	0.00910973	-0.0337919	0.214335	0.273675	-0.0375835	-0.267589	0.12388
1452665_at	2610511O17Rik	-0.762141	-0.617245	-0.591823	0.410276	-0.690683	0.800195	0.011226	0.351426	-0.765691	0.354699	-0.83608	-0.4614	0.645344	0.517827	0.103601	-0.584491	0.299727
1427062_at	Rbbp8	-0.0168235	-1.04081	-0.289842	0.154303	0.356521	0.279353	0.12127	0.12127	0.249092	-0.13158	0.20526	0.0610652	-0.0364227	-0.0562918	-0.215972	-0.181621	-0.0764384
1449106_at	Gpx3	-0.323808	-0.276262	-0.231977	0.0136531	0.0685095	-0.0525855	0.147742	-0.0387871	0.226026	-0.283476	0.168376	0.0578466	0.354729	-0.0441375	0.302691	-0.481814	0.0923911
1418078_at	Psme3	-0.405206	-0.59503	-0.591813	0.23061	-0.516689	0.175044	-0.053657	-0.98032	0.452483	-0.130922	0.0529421	-0.0273457	0.374048	0.195667	0.355838	-0.197814	0.636534
1417548_at	Sart3	-0.586899	-3.5288	-0.668199	-0.132867	0.231705	0.957986	-0.0151721	-0.601798	0.770171	0.593964	0.522485	0.286672	-0.17681	-0.611816	0.108973	-0.253161	-0.705261
1426359_at	Zc3h11a	-0.107294	-0.357017	-0.133191	-0.293393	-0.00559862	0.103473	0.0647308	0.200789	0.0243029	-0.209437	-0.182148	-0.378864	0.179355	0.51193	0.284509	-0.104932	0.0826046
1453175_at	Zbtb25	-0.171154	-0.394593	-0.285325	-0.00821582	0.413808	-0.309285	0.375673	0.349678	0.0277497	-0.00541719	-0.215745	-0.127901	0.155783	-0.215745	0.323206	-0.358433	0.038638
1416446_at	Tmem30a	-0.527661	-0.150294	-0.138889	0.221154	0.456706	0.0712062	-0.294684	0.101245	-0.300448	-0.331977	-0.11533	0.0396163	0.391705	0.288744	0.134094	-0.340265	0.0595534
1421102_a_at	Vamp3	-0.0594035	-0.574862	-0.535572	0.0764103	0.171807	-0.0378933	0.420706	0.0565499	0.150552	-0.0749667	0.145189	0.0159896	-0.0780996	0.338505	0.0735898	-0.472379	-0.0227229
1436343_at	Chd4	-0.716043	-0.903342	-0.5642	0.0692648	0.00151418	0.697588	0.273746	0.0164175	0.150812	0.0862542	0.581475	0.0473484	0.0800993	0.0305303	-0.0151911	-0.247004	-0.565647
1423548_s_at	Ergic3	-0.197389	-0.199776	-0.422765	-0.164385	-0.109505	0.126922	0.165446	-0.186698	0.229818	-0.244655	0.0586735	0.0304437	0.126922	0.155211	0.334959	-0.0927751	0.158009
1434133_s_at	Wdr42a	-0.540543	-0.492102	-0.568971	0.507898	-0.355836	-0.478556	0.0420722	-0.387133	0.0699962	0.141921	0.124273	0.1463	0.511296	-0.362042	0.0183821	-0.0500976	0.748644
1452627_at	Senp6	-0.211433	-0.502696	-0.217523	-0.0824622	0.0318176	0.0491689	-0.0236574	-0.142607	0.127171	0.148163	0.115591	0.0389875	-0.0494974	0.2733	0.294852	-0.139135	0.0822666
1416482_at	Ttc3	-0.406687	-0.422283	-0.311639	-0.0289708	0.104003	0.616397	0.214026	-0.542123	-0.0190553	0.136304	0.0839019	0.240682	-0.104543	0.197113	0.0295249	-0.202133	-0.0510277
1428870_at	Nolc1	-0.622067	-0.385394	-0.51745	0.161556	-0.101479	0.273797	-0.375198	-0.348356	0.221009	0.0296439	0.241032	-0.0250991	0.467521	-0.299336	0.104412	-0.218124	0.66817
1449849_a_at	Fbxl6	-1.21114	-0.814939	-1.20435	0.137755	0.143088	-0.0351788	0.493481	0.429446	0.885898	-0.0381938	0.213224	0.124334	-0.0172197	-0.60367	-0.112512	-0.715059	0.463951
1451015_at	Tkt	-0.155201	-0.416378	-0.396544	-0.142916	-0.185807	0.0837594	0.0460703	-0.183354	0.306268	-0.100647	0.239708	0.135499	0.0324882	0.183295	0.216986	-0.0412532	0.130382
1429681_a_at	Gpsn2	-0.185324	-0.224694	-0.534895	-0.0540002	-0.0592102	-0.106722	-0.134447	-0.266263	0.329431	-0.196761	0.134117	-0.0396519	0.215403	0.0257804	0.469387	-0.0106881	0.292538
1449932_at	Csnk1d	-0.36405	-0.613552	-0.376695	-0.377965	0.149515	0.0669494	-0.0396067	-0.441633	0.410196	-0.415306	0.488276	0.156553	-0.0742005	0.21671	0.240087	-0.433685	0.617579
1451676_at	Drap1	-0.393569	-0.309263	-0.505008	-0.100005	-0.212621	0.105473	-0.10209	-0.317718	0.325411	0.0265668	0.270068	-0.0803484	0.0567814	0.172546	0.481829	-0.147658	0.300375
1415977_at	Isyna1	-0.945881	-0.5096	-0.730964	-0.24528	0.0383752	0.230756	-0.273824	0.259108	0.243629	-0.579141	0.471764	0.529219	0.124409	0.212165	0.382298	-0.347755	0.120427
1452267_at	Flywch1	-0.33726	-0.301563	-0.501361	-0.0990349	-0.0575066	-0.202223	-0.00393201	-0.119608	-0.433787	0.00203201	0.260695	0.061497	-0.0990349	0.0841635	0.863457	-0.167	0.402714
1417326_a_at	Anapc11	-0.368149	-0.262624	-0.439207	-0.0515827	-0.787246	0.245717	-0.273975	-0.345219	0.655379	-0.116512	0.214379	-0.0158873	-0.00638964	0.340316	0.466405	-0.273975	0.254434
1448519_at	Tead2	0.00450254	-0.242093	-0.426742	0.154477	0.0902824	-0.124293	-0.11862	-0.450063	-0.0409155	-0.0111791	0.155882	-0.000705752	0.274452	0.102478	0.5931	-0.499341	0.114089
1425591_a_at	Chmp2a	-0.599095	-0.129059	-0.190522	-0.10914	-0.0673601	0.00753247	0.0587426	-0.371892	0.0599999	0.14302	0.121505	0.0384762	0.171217	0.114261	0.387948	-0.100687	0.185112
1421315_s_at	Cttn	-0.734258	-0.19748	-0.475764	-0.246008	-0.00622079	-0.200893	-0.152183	-0.162127	0.156638	-0.206885	0.210295	0.173868	0.0911738	0.327452	0.440741	0.155304	0.319732
1449660_s_at	Coro1c	-0.304947	-0.148279	-0.980296	-0.151777	-0.270321	-0.137837	0.0274562	-0.658368	0.044366	-0.198032	-0.176499	0.0489436	0.0805862	0.427338	0.587988	0.31274	0.604666
1448266_at	Edf1	-0.288899	-0.348709	-0.24384	-0.208779	-0.360205	-0.0467652	0.214462	-0.0576417	0.260225	0.169866	-0.00556429	0.0504984	-0.245615	0.233707	0.663642	-0.234994	0.0153447
1423128_at	Aip	-0.24359	-0.147452	-0.235128	-0.0541304	0.0720205	-0.178405	0.0133703	-0.220737	-0.294172	-0.11604	0.0415018	-0.0929207	0.0454761	-0.103883	0.948525	0.00114402	0.0553644
1421081_a_at	Banf1	-0.138961	-0.260472	-0.439572	-0.179137	0.0369816	-0.103768	0.0902172	-0.391578	0.319047	0.0081059	0.193781	0.0736475	0.119738	0.118903	0.201953	-0.180507	0.261436
